# Supplementary material
Source: Springer Nature journal article supplement (https://www.springermedizin.de/resource/supplementary/12935_2010_267_MOESM5_ESM.pdf/9540182)

**A**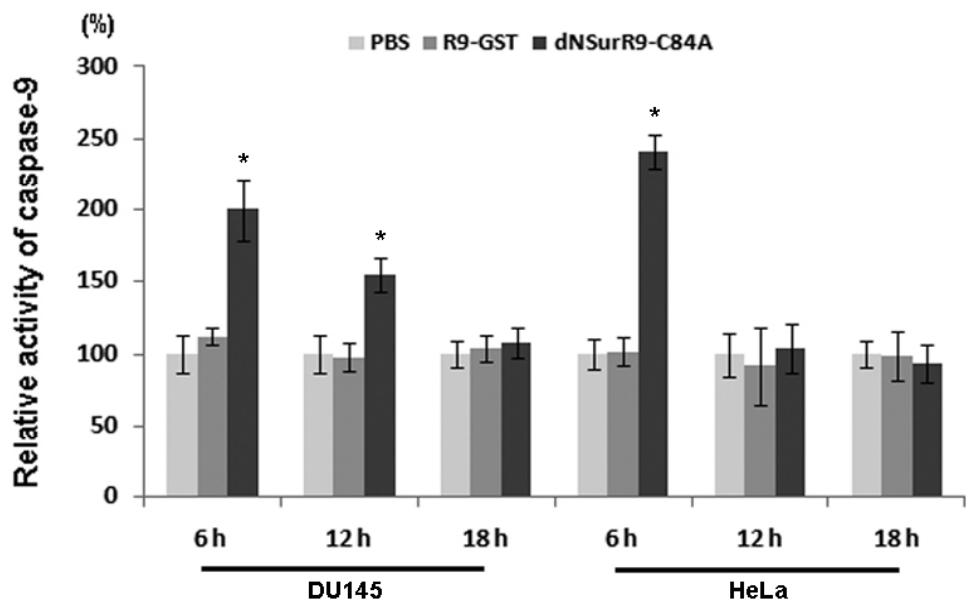**B**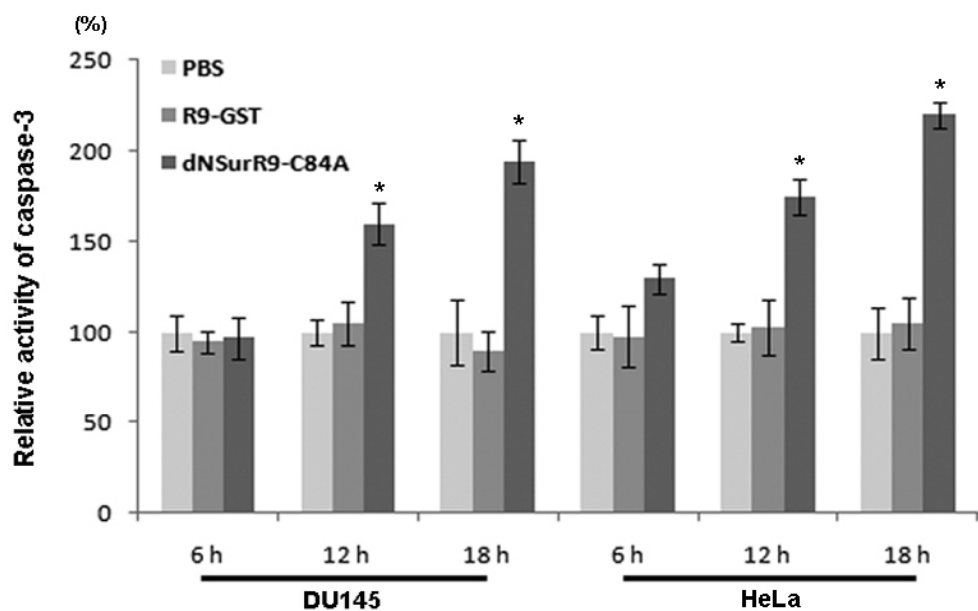

Supplement: MOESM5 [file 9540182]
